# Supplementary material
Source: publisher figshare collection journal article supplement (https://sage.figshare.com/ndownloader/files/22882103)
Supplement: Supplementary file 1 [file 22882103]

Table A2

*Descriptive statistics from data set 1*

|                     | N   | M    | SD    | Min | Max | Skew | Kurtosis |
|---------------------|-----|------|-------|-----|-----|------|----------|
| Mentionings         | 183 | 4.29 | 12.94 | 0   | 110 | 5.56 | 36.26    |
| In parliament       | 183 | .14  |       |     |     |      |          |
| Challenger          | 171 | .32  |       |     |     |      |          |
| Merger or successor | 183 | .16  |       |     |     |      |          |

*Note:* As 'In parliament', 'Challenger' and 'Merger or successor' are dichotomies, their means represent the proportion.
